# Supplementary material for: More aware, more protected: a cross-sectional study on road safety skills predicting the use of passive safety elements among Spanish teenagers
Source: PubMed Central journal article supplement — BMJ Open. 2019 Nov 25;9(11):e035007. doi: 10.1136/bmjopen-2019-035007 (PMC6887036; doi:10.1136/bmjopen-2019-035007), 2019-11-25
Supplement: bmjopen-2019-035007supp001.pdf [file bmjopen-2019-035007supp001.pdf]

**Supplementary File**  
**Paper Questionnaire (researcher form)**

Questionnaire code: \_\_\_\_\_ Date: \_\_\_\_\_

Age: \_\_\_\_\_ Gender: \_\_\_\_\_

City or town of residence: \_\_\_\_\_

Academic year (current): \_\_\_\_\_

**Exposure to information on road safety**

*In this section, we will discuss some issues related to the information you receive on road safety topics from different sources (such as the media, the news, and content you go through at school).*

*Please, state to what extent you agree with the following statements:*

Totally disagree – Disagree – Neutral – Agree – Totally agree

1. Advertising campaigns on traffic influence my behavior
2. Advertising campaigns on traffic should be more present
3. Advertising campaigns are adequately transmitted to young people and children
4. Traffic campaigns are truly effective
5. I can remember the last campaigns on traffic and road safety

**Observed Road Safety Behaviors in Parents**

*We will now discuss some behaviors observed in your parents (or tutors) when they drive (if they do not own a car, please leave this section blank).*

How frequently do you observe the following behaviors in your parents?

Never – Rarely – Sometimes – Frequently – Always/almost always

1. My parents use the seatbelt while driving or accompanying someone in the car
2. My parents avoid using their cellphones in the car when they are driving
3. My parents respect the speed limits when they drive

**General Health Questionnaire (GHQ)**

*We would like to know how your health has been over the past few weeks. Below, we will present a brief set of issues that may (or not) apply to you during this period. Have you recently:*

Less than usual – No more than usual – Rather more than usual – Much more than usual

1. Been able to concentrate on whatever you are doing?
2. Lost much sleep over worry?
3. Felt that you were playing a useful part in things?

4. Felt capable of making decisions about things?
5. Felt constantly under strain?
6. Felt that you couldn't overcome your difficulties?
7. Been able to enjoy day-to-day activities?
8. Been able to face problems?
9. Been feeling unhappy and depressed?
10. Been losing confidence in yourself?
11. Been thinking of yourself as a worthless person?
12. Feeling reasonably happy, all things considered?

### **Attitudes towards road safety**

*Do you agree with the following statements?*

Agree - Disagree

1. Even if it were not mandatory, I would still use the safety seatbelt
2. The use of helmets should be voluntary, they should be used only by those who want to
3. Traffic norms and rules are only good for writing us tickets
4. People who do not comply with the norms should be fined more
5. It is annoying to use the road and pay attention to every road safety norm
6. When I travel by car I like overtaking others, as if we were doing a race

### **Risk Perception**

*Do you agree with the following statements?*

Agree – Disagree

1. Traveling by bus is safer than traveling by car
2. When the roads or vehicles we are using for traveling are very safe, we can take more risks
3. Sometimes, wearing a seatbelt could be more dangerous than not wearing it
4. When the vehicle has an airbag, it is not necessary to use a seatbelt
5. Wearing a helmet when using a skateboard is more important than when riding a bike
6. Driving for more than four hours in a row increases the risk of suffering accidents

**Knowledge of Traffic Rules**

*Please, indicate whether the following statements regarding Spanish traffic norms are true or false*

True - False

1. On a crosswalk, you can cross the road without looking around you, since pedestrians always have the priority
2. You must always wear a helmet when you ride a bike
3. Passengers in the backseat of a vehicle do not have to use seatbelts
4. Kids older than 12 can already sit on the passenger side
5. The maximum blood alcohol limit allowed for driving a motorbike is 0,5 g/l
6. A driver who is waiting at a traffic light is allowed to answer phone calls
